# Supplementary material
Source: PubMed Central journal article supplement (PMC3880628)
Supplement: NIHMS532740-supplement-13361_2013_755_MOESM1_ESM.pdf [file NIHMS532740-supplement-13361_2013_755_MOESM1_ESM.pdf]

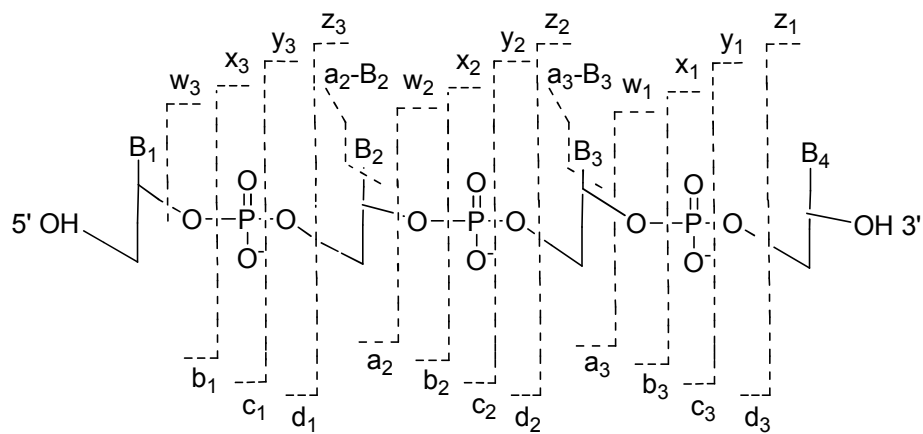

Oligonucleotide Fragmentation Nomenclature

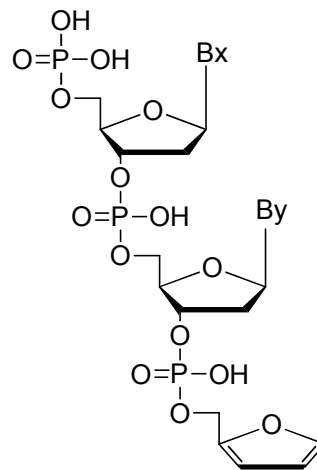

Bx:By internal fragments

**Supplemental Information Figure 1** Oligonucleotide fragmentation nomenclature. Internal fragments result from a double backbone cleavage. The internal ions have a phosphate at their 5' end and a furan at the 3' terminal.
