# Supplementary material
Source: PubMed Central journal article supplement (PMC3880628)

**Supplemental Figure 2.** Expanded regions of IRMPD spectra for (A) G3-D/cisplatin and (B) G3-H/cisplatin adducts showing some of the diagnostic fragment ions that allow differentiation of the adducts.

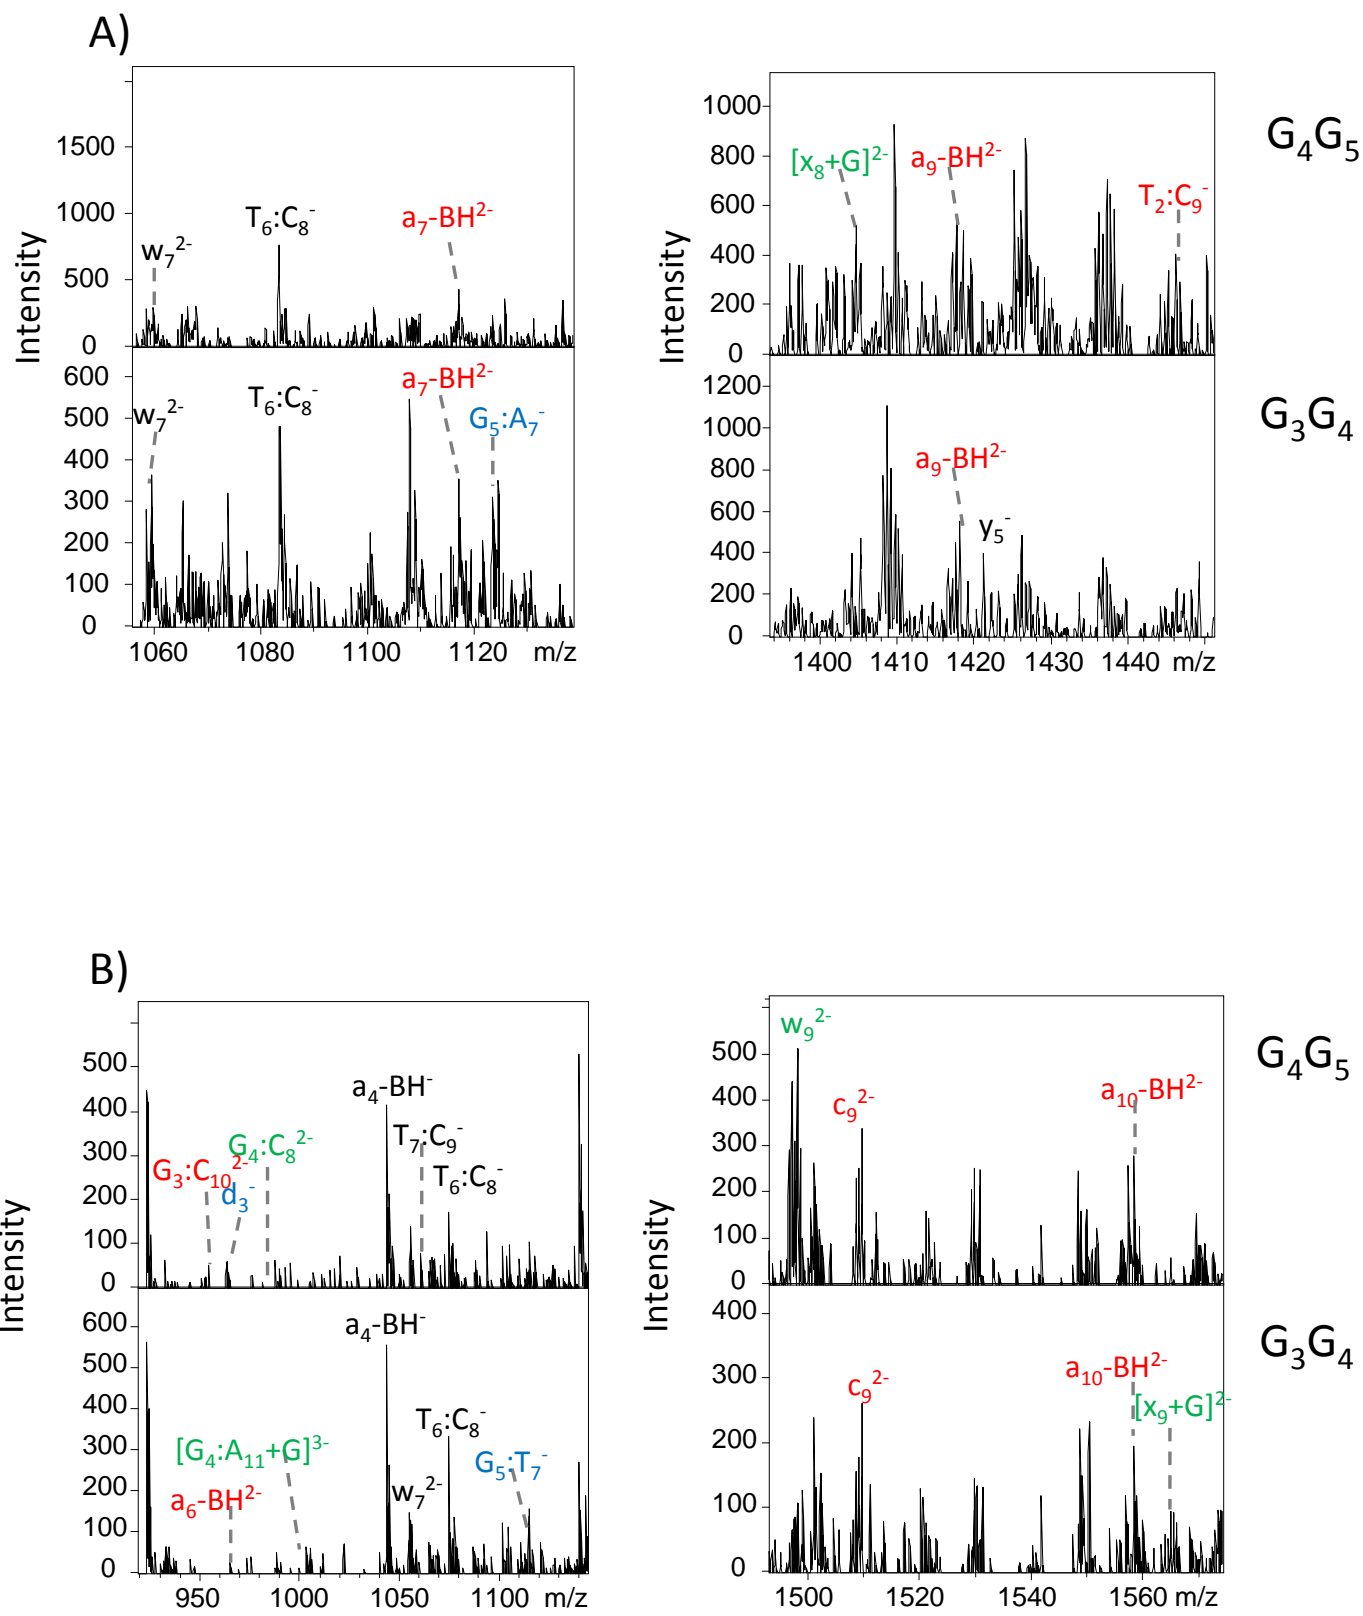

Supplement: NIHMS532740-supplement-13361_2013_755_MOESM2_ESM.pdf [file NIHMS532740-supplement-13361_2013_755_MOESM2_ESM.pdf]
