# Supplementary material
Source: PubMed Central journal article supplement (PMC3880628)
Supplement: NIHMS532740-supplement-13361_2013_755_MOESM3_ESM.pdf [file NIHMS532740-supplement-13361_2013_755_MOESM3_ESM.pdf]

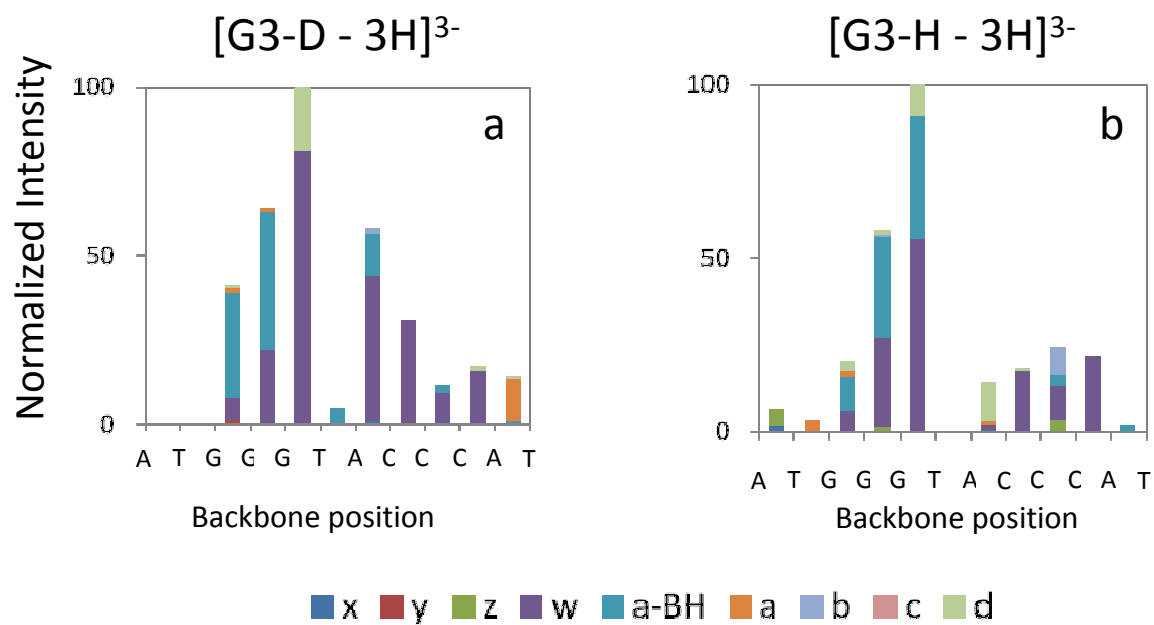

**Supplemental Information Figure 3.** Relative abundances of IRMPD fragment ions at each backbone cleavage site for (a) all fragments of [G3-D-3H]<sup>3-</sup>; (b) all fragments of [G3-H-3H]<sup>3-</sup>.
