# Supplementary material
Source: PubMed Central journal article supplement (PMC3880628)
Supplement: NIHMS532740-supplement-13361_2013_755_MOESM4_ESM.pdf [file NIHMS532740-supplement-13361_2013_755_MOESM4_ESM.pdf]

Supplemental Table 1: The relative abundances of fragments upon IRMPD for G3-D/cisplatin cross-links (3-)

| Fragment                                            | m/z    | Relative abundance (%) | Fragment                                             | m/z    | Relative abundance (%) |
|-----------------------------------------------------|--------|------------------------|------------------------------------------------------|--------|------------------------|
| <i>G4G5</i>                                         |        |                        | <i>G3G4</i>                                          |        |                        |
| G <sub>n</sub> :G <sub>n</sub> <sup>-</sup>         | 506.5  | 6.1                    | G <sub>n</sub> :G <sub>n</sub> <sup>-</sup>          | 506.4  | 2.4                    |
| b <sub>2</sub> <sup>-</sup>                         | 554.7  | 13.7                   | a <sub>5</sub> -BH+◆ <sup>3-</sup>                   | 533.4  | 1.0                    |
| w <sub>2</sub> <sup>-</sup>                         | 634.4  | 68.3                   | b <sub>2</sub> <sup>-</sup>                          | 554.4  | 1.8                    |
| a <sub>6</sub> -BH+◆ <sup>3-</sup>                  | 642.9  | 3.1                    | c <sub>2</sub> <sup>-</sup>                          | 616.3  | 1.6                    |
| a <sub>3</sub> -BH <sup>-</sup>                     | 714.6  | 25.4                   | w <sub>2</sub> <sup>-</sup>                          | 634.4  | 31.0                   |
| C <sub>n</sub> :C <sub>n+1</sub> <sup>-</sup>       | 755.3  | 11.8                   | G <sub>3</sub> :A <sub>7</sub> +◆ <sup>3-</sup>      | 669.1  | 1.8                    |
| T <sub>6</sub> :A <sub>7</sub> <sup>-</sup>         | 794.5  | 12.9                   | T <sub>2</sub> :G <sub>4</sub> +◆ <sup>2-</sup>      | 684.4  | 1.5                    |
| T <sub>2</sub> :G <sub>3</sub> <sup>-</sup>         | 810.4  | 57.5                   | G <sub>3</sub> :G <sub>5</sub> +◆ <sup>2-</sup>      | 696.4  | 1.1                    |
| b <sub>8</sub> +◆ <sup>3-</sup>                     | 812.3  | 5.4                    | a <sub>3</sub> -BH <sup>-</sup>                      | 714.4  | 16.7                   |
| z <sub>3</sub> <sup>-</sup>                         | 825.4  | 6.6                    | C <sub>n</sub> :C <sub>n+1</sub> <sup>-</sup>        | 755.4  | 15.5                   |
| a <sub>8</sub> +◆ <sup>3-</sup>                     | 885.8  | 1.9                    | T <sub>6</sub> :A <sub>7</sub> <sup>-</sup>          | 794.3  | 8.5                    |
| w <sub>6</sub> <sup>2-</sup>                        | 907.1  | 13.9                   | G <sub>5</sub> :T <sub>6</sub> <sup>-</sup>          | 810.4  | 29.1                   |
| w <sub>3</sub> <sup>-</sup>                         | 923.4  | 32.5                   | w <sub>3</sub> <sup>-</sup>                          | 923.4  | 13.9                   |
| T <sub>2</sub> :T <sub>6</sub> +◆ <sup>2-</sup>     | 1000.4 | 3.9                    | a <sub>9</sub> -BH+◆ <sup>3-</sup>                   | 945.3  | 7.1                    |
| d <sub>9</sub> +◆ <sup>3-</sup>                     | 1014.6 | 2.8                    | a <sub>9</sub> +◆ <sup>3-</sup>                      | 982.0  | 1.4                    |
| a <sub>4</sub> -BH <sup>-</sup>                     | 1043.4 | 24.8                   | C <sub>8</sub> :C <sub>10</sub> <sup>-</sup>         | 1044.4 | 13.5                   |
| w <sub>7</sub> <sup>2-</sup>                        | 1059.7 | 4.9                    | w <sub>7</sub> <sup>2-</sup>                         | 1059.4 | 4.1                    |
| T <sub>6</sub> :C <sub>8</sub> <sup>-</sup>         | 1083.3 | 27.3                   | T <sub>6</sub> :C <sub>8</sub> <sup>-</sup>          | 1083.4 | 5.5                    |
| a <sub>7</sub> -BH+◆ <sup>2-</sup>                  | 1117.0 | 7.0                    | a <sub>7</sub> -BH+◆ <sup>2-</sup>                   | 1117.1 | 4.0                    |
| T <sub>2</sub> :A <sub>7</sub> +◆ <sup>2-</sup>     | 1156.5 | 10.0                   | G <sub>5</sub> :A <sub>7</sub> <sup>-</sup>          | 1123.4 | 4.0                    |
| T <sub>2</sub> :A <sub>11</sub> +◆ <sup>3-</sup>    | 1164.4 | 21.5                   | T <sub>2</sub> :A <sub>7</sub> +◆ <sup>2-</sup>      | 1157.3 | 8.9                    |
| a <sub>7</sub> +◆ <sup>2-</sup>                     | 1185.1 | 7.6                    | T <sub>2</sub> :A <sub>11</sub> +◆ <sup>3-</sup>     | 1164.3 | 6.9                    |
| [G <sub>5</sub> :T <sub>6</sub> +G+◆] <sup>-</sup>  | 1189.3 | 6.9                    | [G <sub>4</sub> :C <sub>9</sub> +G+◆] <sup>2-</sup>  | 1204.7 | 5.0                    |
| w <sub>4</sub> <sup>-</sup>                         | 1212.3 | 100.0                  | w <sub>4</sub> <sup>-</sup>                          | 1212.3 | 100.0                  |
| c <sub>7</sub> +◆ <sup>2-</sup>                     | 1224.8 | 6.6                    | d <sub>7</sub> +◆ <sup>2-</sup>                      | 1233.5 | 3.5                    |
| -GH+◆ <sup>3-</sup>                                 | 1239.7 | 26.2                   | -GH+◆ <sup>3-</sup>                                  | 1239.2 | 4.6                    |
| -AH+◆ <sup>3-</sup>                                 | 1244.1 | 10.4                   | a <sub>4</sub> -BH+◆ <sup>-</sup>                    | 1272.7 | 21.5                   |
| -TH+◆ <sup>3-</sup>                                 | 1247.8 | 9.1                    | [G <sub>4</sub> :C <sub>10</sub> +G+◆] <sup>2-</sup> | 1349.1 | 7.7                    |
| a <sub>8</sub> +◆ <sup>2-</sup>                     | 1329.1 | 16.7                   | T <sub>6</sub> :C <sub>9</sub> <sup>-</sup>          | 1373.2 | 9.1                    |
| [G <sub>5</sub> :A <sub>11</sub> +G+◆] <sup>-</sup> | 1341.7 | 9.5                    | a <sub>9</sub> -BH+◆ <sup>2-</sup>                   | 1418.1 | 7.1                    |
| T <sub>6</sub> :C <sub>9</sub> <sup>-</sup>         | 1372.2 | 36.5                   | γ <sub>5</sub> <sup>-</sup>                          | 1422.1 | 4.6                    |
| [x <sub>8</sub> +G+◆] <sup>2-</sup>                 | 1404.3 | 8.3                    | w <sub>5</sub> <sup>-</sup>                          | 1501.1 | 20.6                   |
| a <sub>9</sub> -BH+◆ <sup>2-</sup>                  | 1418.4 | 8.1                    | c <sub>9</sub> +◆ <sup>2-</sup>                      | 1514.6 | 1.6                    |
| T <sub>2</sub> :C <sub>9</sub> +◆ <sup>2-</sup>     | 1446.1 | 6.6                    | d <sub>4</sub> +◆ <sup>-</sup>                       | 1522.1 | 2.8                    |
| a <sub>9</sub> +◆ <sup>2-</sup>                     | 1474.6 | 6.2                    | T <sub>2</sub> :C <sub>10</sub> +◆ <sup>2-</sup>     | 1591.1 | 1.4                    |
| w <sub>5</sub> <sup>-</sup>                         | 1501.1 | 28.1                   | T <sub>6</sub> :C <sub>10</sub> <sup>-</sup>         | 1662.1 | 3.4                    |
| a <sub>10</sub> -BH+◆ <sup>2-</sup>                 | 1563.2 | 5.8                    | γ <sub>6</sub> <sup>-</sup>                          | 1735.2 | 3.8                    |
| a <sub>10</sub> +◆ <sup>2-</sup>                    | 1618.1 | 5.5                    | a <sub>11</sub> +◆ <sup>2-</sup>                     | 1775.1 | 2.4                    |
| T <sub>6</sub> :C <sub>10</sub> <sup>-</sup>        | 1662.1 | 6.3                    | -TH+◆ <sup>3•</sup>                                  | 1871.1 | 1.7                    |
| T <sub>2</sub> :G <sub>5</sub> +◆ <sup>-</sup>      | 1698.0 | 5.4                    | -CH+◆ <sup>3•</sup>                                  | 1878.3 | 5.6                    |
| a <sub>11</sub> +◆ <sup>2-</sup>                    | 1775.1 | 6.3                    |                                                      |        |                        |
| -TH+◆ <sup>3•</sup>                                 | 1871.1 | 6.5                    |                                                      |        |                        |
| -CH+◆ <sup>3•</sup>                                 | 1879.1 | 12.4                   |                                                      |        |                        |

◆ stands for Pt(NH<sub>3</sub>)<sub>2</sub> modification
