# Supplementary material
Source: PubMed Central journal article supplement (PMC3880628)
Supplement: NIHMS532740-supplement-13361_2013_755_MOESM5_ESM.pdf [file NIHMS532740-supplement-13361_2013_755_MOESM5_ESM.pdf]

Supplemental Table 2: The relative abundances of fragments upon IRMPD for G3-H/cisplatin cross-links (3-).

| Fragment                                           | m/z    | Relative abundance (%) | Fragment                                             | m/z    | Relative abundance (%) |
|----------------------------------------------------|--------|------------------------|------------------------------------------------------|--------|------------------------|
| <i>G4G5</i>                                        |        |                        | <i>G3G4</i>                                          |        |                        |
| G <sub>n</sub> :G <sub>n</sub> <sup>-</sup>        | 506.4  | 13.9                   | G <sub>n</sub> :G <sub>n</sub> <sup>-</sup>          | 506.4  | 10.6                   |
| b <sub>2</sub> <sup>-</sup>                        | 554.4  | 6.1                    | c <sub>2</sub> <sup>-</sup>                          | 616.4  | 2.7                    |
| w <sub>2</sub> <sup>-</sup>                        | 634.5  | 100.0                  | w <sub>2</sub> <sup>-</sup>                          | 634.4  | 54.7                   |
| T <sub>6</sub> :C <sub>9</sub> <sup>2-</sup>       | 681.5  | 4.7                    | a <sub>3</sub> -BH <sup>-</sup>                      | 714.4  | 83.4                   |
| a <sub>3</sub> -BH <sup>-</sup>                    | 714.5  | 56.2                   | C <sub>8</sub> :C <sub>9</sub> <sup>-</sup>          | 755.3  | 3.1                    |
| a <sub>7</sub> -BH+◆ <sup>3-</sup>                 | 744.3  | 5.5                    | d <sub>4</sub> <sup>2-</sup>                         | 760.4  | 3.5                    |
| C <sub>n</sub> :C <sub>n+1</sub> <sup>-</sup>      | 755.4  | 16.3                   | T <sub>6</sub> :T <sub>7</sub> <sup>-</sup>          | 785.4  | 22.7                   |
| T <sub>6</sub> :T <sub>7</sub> <sup>-</sup>        | 785.4  | 24.0                   | G <sub>5</sub> :T <sub>6</sub> <sup>-</sup>          | 810.3  | 35.7                   |
| T <sub>2</sub> :G <sub>3</sub> <sup>-</sup>        | 810.7  | 21.4                   | T <sub>6</sub> :C <sub>10</sub> <sup>2-</sup>        | 826.7  | 3.9                    |
| z <sub>3</sub> <sup>-</sup>                        | 825.8  | 13.5                   | a <sub>8</sub> -BH+◆ <sup>3-</sup>                   | 846.3  | 2.4                    |
| a <sub>3</sub> <sup>-</sup>                        | 865.4  | 1.8                    | w <sub>3</sub> <sup>-</sup>                          | 923.3  | 44.1                   |
| w <sub>3</sub> <sup>-</sup>                        | 923.5  | 50.0                   | a <sub>6</sub> -BH+◆ <sup>2-</sup>                   | 965.2  | 2.3                    |
| G <sub>3</sub> :C <sub>10</sub> +◆ <sup>2-</sup>   | 954.4  | 5.8                    | [G <sub>4</sub> :A <sub>11</sub> +G+◆] <sup>3-</sup> | 999.3  | 1.0                    |
| d <sub>3</sub> <sup>-</sup>                        | 963.2  | 6.7                    | a <sub>4</sub> -BH <sup>-</sup>                      | 1043.4 | 43.3                   |
| G <sub>4</sub> :C <sub>8</sub> +◆ <sup>-</sup>     | 980.9  | 1.5                    | w <sub>7</sub> <sup>2-</sup>                         | 1054.4 | 11.6                   |
| a <sub>4</sub> -BH <sup>-</sup>                    | 1043.5 | 46.4                   | T <sub>6</sub> :C <sub>8</sub> <sup>-</sup>          | 1074.3 | 26.1                   |
| T <sub>7</sub> :C <sub>9</sub> <sup>-</sup>        | 1059.6 | 8.9                    | γ <sub>10</sub> +◆ <sup>3-</sup>                     | 1081.3 | 4.9                    |
| T <sub>6</sub> :C <sub>8</sub> <sup>-</sup>        | 1074.3 | 19.2                   | G <sub>5</sub> :T <sub>7</sub> <sup>-</sup>          | 1114.3 | 12.3                   |
| T <sub>2</sub> :T <sub>7</sub> +◆ <sup>2-</sup>    | 1152.4 | 32.8                   | T <sub>2</sub> :T <sub>7</sub> +◆ <sup>2-</sup>      | 1152.2 | 27.6                   |
| a <sub>11</sub> +◆ <sup>3-</sup>                   | 1179.9 | 15.1                   | T <sub>2</sub> :A <sub>11</sub> +◆ <sup>3-</sup>     | 1161.1 | 30.5                   |
| x <sub>11</sub> +◆ <sup>3-</sup>                   | 1204.3 | 23.3                   | [G <sub>4</sub> :C <sub>9</sub> +G+◆] <sup>2-</sup>  | 1200.0 | 24.6                   |
| w <sub>4</sub> <sup>-</sup>                        | 1212.4 | 100.0                  | w <sub>4</sub> <sup>-</sup>                          | 1212.3 | 100.0                  |
| -GH+◆ <sup>3-</sup>                                | 1236.3 | 41.4                   | -GH+◆ <sup>3-</sup>                                  | 1236.8 | 24.6                   |
| -TH+◆ <sup>3-</sup>                                | 1244.9 | 68.5                   | -TH+◆ <sup>3-</sup>                                  | 1244.3 | 24.1                   |
| a <sub>8</sub> -BH+◆ <sup>2-</sup>                 | 1269.3 | 37.0                   | a <sub>8</sub> +◆ <sup>2-</sup>                      | 1324.8 | 15.1                   |
| a <sub>8</sub> +◆ <sup>2-</sup>                    | 1324.3 | 43.1                   | b <sub>8</sub> +◆ <sup>2-</sup>                      | 1333.2 | 26.9                   |
| b <sub>8</sub> +◆ <sup>2-</sup>                    | 1333.3 | 57.9                   | [G <sub>4</sub> :C <sub>10</sub> +G+◆] <sup>2-</sup> | 1344.2 | 27.2                   |
| C <sub>8</sub> +◆ <sup>2-</sup>                    | 1364.3 | 17.5                   | T <sub>6</sub> :C <sub>9</sub> <sup>-</sup>          | 1363.3 | 18.6                   |
| a <sub>5</sub> -BH <sup>-</sup>                    | 1372.3 | 75.8                   | G <sub>5</sub> :C <sub>8</sub> <sup>-</sup>          | 1404.2 | 55.0                   |
| G <sub>3</sub> :G <sub>5</sub> +◆ <sup>-</sup>     | 1394.0 | 9.9                    | a <sub>9</sub> -BH+◆ <sup>2-</sup>                   | 1413.2 | 32.6                   |
| [x <sub>8</sub> +G+◆] <sup>2-</sup>                | 1399.7 | 32.0                   | G <sub>3</sub> :C <sub>10</sub> +◆ <sup>2-</sup>     | 1433.2 | 48.4                   |
| [w <sub>8</sub> +G+◆] <sup>2-</sup>                | 1408.2 | 44.4                   | b <sub>4</sub> <sup>-</sup>                          | 1441.7 | 16.0                   |
| T <sub>2</sub> :C <sub>9</sub> +◆ <sup>2-</sup>    | 1441.2 | 73.4                   | c <sub>9</sub> +◆ <sup>2-</sup>                      | 1509.7 | 7.0                    |
| x <sub>9</sub> +◆ <sup>2-</sup>                    | 1489.7 | 63.6                   | a <sub>10</sub> -BH+◆ <sup>2-</sup>                  | 1558.2 | 14.4                   |
| w <sub>9</sub> +◆ <sup>2-</sup>                    | 1498.2 | 57.1                   | [x <sub>9</sub> +G+◆] <sup>2-</sup>                  | 1564.7 | 7.4                    |
| c <sub>9</sub> +◆ <sup>2-</sup>                    | 1509.7 | 37.7                   | T <sub>2</sub> :C <sub>10</sub> +◆ <sup>2-</sup>     | 1586.1 | 13.2                   |
| a <sub>10</sub> -BH+◆ <sup>2-</sup>                | 1558.2 | 31.3                   | T <sub>6</sub> :C <sub>10</sub> <sup>-</sup>         | 1653.2 | 13.2                   |
| T <sub>2</sub> :C <sub>10</sub> +◆ <sup>2-</sup>   | 1586.1 | 64.4                   | a <sub>11</sub> -BH+◆ <sup>2-</sup>                  | 1702.8 | 12.5                   |
| a <sub>10</sub> +◆ <sup>2-</sup>                   | 1614.2 | 15.0                   | z <sub>11</sub> +◆ <sup>2-</sup>                     | 1766.1 | 4.1                    |
| a <sub>11</sub> -BH+◆ <sup>2</sup>                 | 1703.2 | 27.9                   | -CH+◆ <sup>3•</sup>                                  | 1876.7 | 2.3                    |
| z <sub>11</sub> +◆ <sup>2-</sup>                   | 1766.3 | 16.1                   |                                                      |        |                        |
| [G <sub>5</sub> :C <sub>8</sub> +G+◆] <sup>-</sup> | 1783.1 | 9.0                    |                                                      |        |                        |
| -CH+◆ <sup>3•</sup>                                | 1877.2 | 3.7                    |                                                      |        |                        |

◆ stands for Pt(NH<sub>3</sub>)<sub>2</sub> modification
